# Supplementary material for: Metal cages using a bulky phosphonate as a ligand
Source: Royal Society of Chemistry journal article supplement (doi:10.1039/b613756c), 2006-11-24
Supplement: b613756c.doc [file b613756c.doc]

Supplementary materials

Metal clusters using a bulky phosphonate as a ligand

Viswanathan Baskar,* Muralidharan Shanmugam, E. Carolina Sanudo, Maheswaran Shanmugam, David Collison, Eric J. L. McInnes, Qiang Wei and Richard E. P. Winpenny*


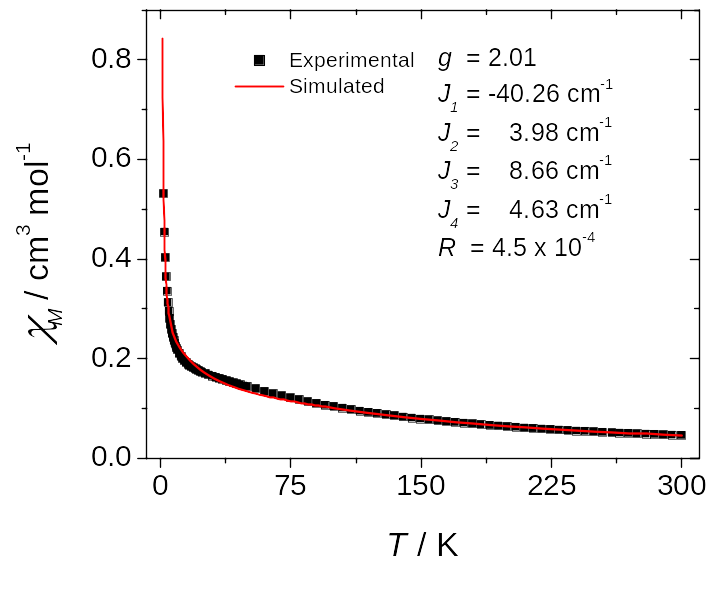


a)

b)

Mn1

Mn2

Mn4

*J1*

*J2*

*J2*

*J3*

*J4*

c)

Mn3

**Fig. S1.** a) Plot of molar magnetic susceptibility as a function of temperature of **1** b) plot of *MT* vs *T* of **1**;the red solid line represents best fit obtained using the following Hamiltonian (equation 1) the mentioned parameters in the above figure c) Field dependence of magnetisation at constant temperature for complex **1**.

……………… Eqn 1

*g* = 2.26

*J1 =* -0.96 cm-1

**Fig. S2.** Plot of *MT* vs *T* of **2**;the red solid line represents best fit obtained with Van Vleck equation using the following Hamiltonian (*-2JSaSb*) the mentioned parameters in the above figure (top) b) Field dependence of magnetisation at constant temperature for complex **2**.

With 3J:

Cu3

J2

J1

Cu2

J2

Cu1

Cu4

J3

J3

J3

**Fig. S3.** a) Plot of molar magnetic susceptibility as a function of temperature of **3** b) plot of *MT* vs *T* of **3**;the red solid line represents best fit obtained the mentioned parameters in the above figure

With 4J:

Cu3

J2

J1

Cu2

J2

Cu1

Cu4

J4

J4

J3

J34

**Fig. S3a.** a) Plot of molar magnetic susceptibility as a function of temperature of **3** b) plot of *MT* vs *T* of **3**;the red solid line represents best fit obtained the mentioned parameters in the above figure.

**Fig. S4.** K-band epr spectra recorded on powdered samples of **1** and **2** at 5.0 K

**Fig. S5.** K-band epr spectra recorded on powdered samples of **3** at 5.0 K.

**Fig. S6.** Q-band epr spectra recorded on powdered samples of **3** at 5.0 K

| Spin State | g tensor | A/G (coupled with 2 Cu) | Hyperfine/G | Linewidth/G |
| --- | --- | --- | --- | --- |
| 1/2 | gx = 2.0879, gy = 2.0630,  gz = 2.313 | CuAx = CuAy = 5,  CuAz = 65 | CuAx = CuAy = 5, CuAz = 40 | Wx = 60, Wy = 80,  Wz = 25 |
| 1/2 | gx = 2.1677, gy = 2.021,  gz = 2.277 | CuAx = 50, CuAy = 20,  CuAz = 75 | ............................................ | Wx = 43, Wy = 80,  Wz = 68 |

**Table S1**. Simulated spin Hamiltonian parameters for complex **3**.
